# Supplementary material for: Morphology Transition Engineering of ZnO Nanorods to Nanoplatelets Grafted Mo8O23-MoO2 by Polyoxometalates: Mechanism and Possible Applicability to other Oxides
Source: PubMed Central journal article supplement (PMC5517553; doi:10.1038/s41598-017-05750-x), 2017-07-19
Supplement: 41598_2017_5750_MOESM1_ESM.pdf [file 41598_2017_5750_MOESM1_ESM.pdf]

## Supporting Information

### **Morphology Transition Engineering of ZnO Nanorods to Nanoplatelets Grafted $\text{Mo}_8\text{O}_{23}\text{-MoO}_2$ by Polyoxometalates: Mechanism and Possible Applicability to other Oxides**

Ahmed.H.Abdelmohsen,<sup>¶,§,†,\*</sup> Waleed.M.A.El Rouby,<sup>¶,\*</sup> Nahla Ismail,<sup>¶</sup> Ahmed.A.Farghali<sup>¶</sup>

<sup>¶</sup> Materials Science and Nanotechnology Department, Faculty of Postgraduate Studies for Advanced Science (PSAS), Beni-Suef University, 62511 Beni-Suef, Egypt., <sup>§</sup> Augsburg University, Institute of Physics, Universitätsstrass 1, 86159 Augsburg, Germany., <sup>†</sup> Institute of Condensed Matter and Nanosciences (IMCN), Bio- and Soft Matter, Université catholique de Louvain, Louvain la Neuve, B-1348 Belgium., and <sup>¶</sup> Physical Chemistry Department, Centre of Excellence for Advanced Sciences, Renewable Energy Group, National Research Centre, 12311 Dokki, Giza, Egypt.

#### **(A) Carbonaceous Polysaccharide as a Template for Fabricating C/SiO<sub>2</sub> Core-Shell Nanostructure:**

In a typical procedure, glucose (50 g) was dissolved in deionized water (500 mL) to form a clear solution. The solution was then sealed in a 700 mL autoclave with a Teflon seal and maintained at 170 °C for 7 and 8 hours. The autoclave was cooled at air for 20 h until settling of product and suspending of impurities (non-uniformed structures). Black or dark purple puce products were obtained after centrifugation at 5000 rpm for 20 min. A rinsing process involving five cycles of centrifugation/washing/ redispersion was performed with water or ethanol, respectively. The final samples were obtained after oven-drying at 80 °C for more than 4 h. Figure S<sub>1</sub> (a and b) show IR charts for carbon template prepared at 170 °C for 7 and 8 hours respectively.

Oven-dried carbonaceous microspheres (100 mg) were evenly dispersed in 0.2M solution of SiCl<sub>4</sub> with the assistance of ultra-sonication. The ultra-sonication was continued for 60 min to ensure sufficient diffusion of the metal ions into the surface layer. A rinsing process involving 3–5 cycles of centrifugation/washing/redispersion was performed with either water or ethanol, according to the solvent used initially. The black or puce samples obtained were oven-dried at 80 °C for 4 h and used as precursors of the hollow spheres. The samples obtained after ion absorption as described above were transferred to alumina crucibles, and these were placed in a muffle furnace. Calcination was carried out in air. In typical procedures, the calcination parameters were set as 500 °C for 1 h. The furnace was then left to cool to room temperature. As-formed products were accumulated at the bottom of the crucibles. TEM image and EDX of C/SiO<sub>2</sub> core-shell sphere (C- template at 170 °C for 8 hours) are shown in Figure S<sub>1</sub> (c and d) respectively.

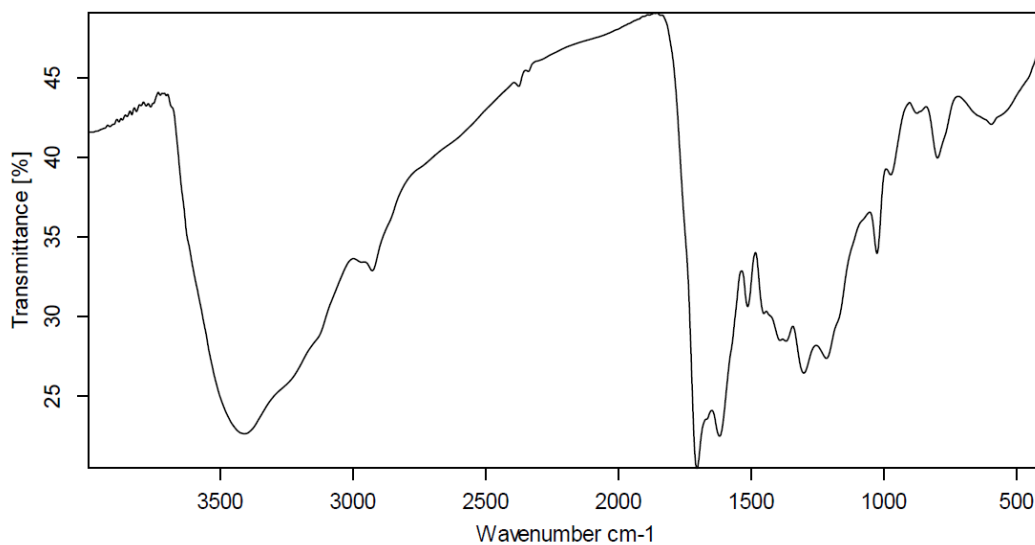

۳۳

۳۴

Figure S<sub>1</sub>(a): IR chart for carbon template prepared at 170 °C for 7 hours.

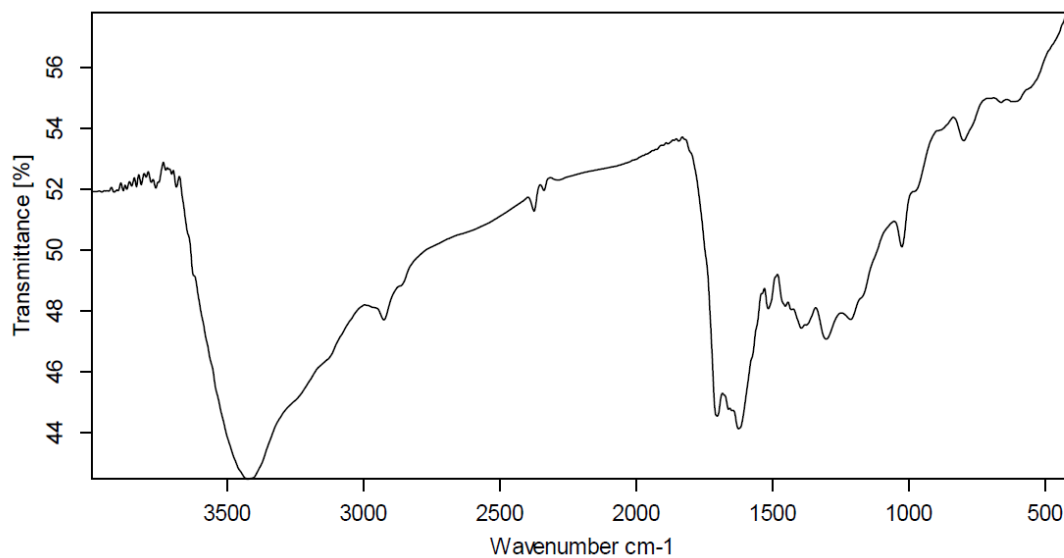

۳۵

۳۶

Figure S<sub>1</sub>(b): IR chart for carbon template prepared at 170 °C for 8 hours.

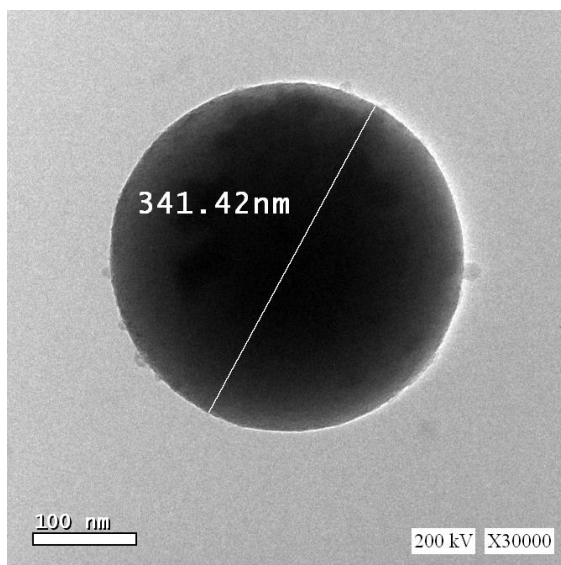

37  
38  
39

Figure S<sub>1</sub>(c): TEM image of C/SiO<sub>2</sub> core-shell sphere (C template at at 170 °C for 8 hours).

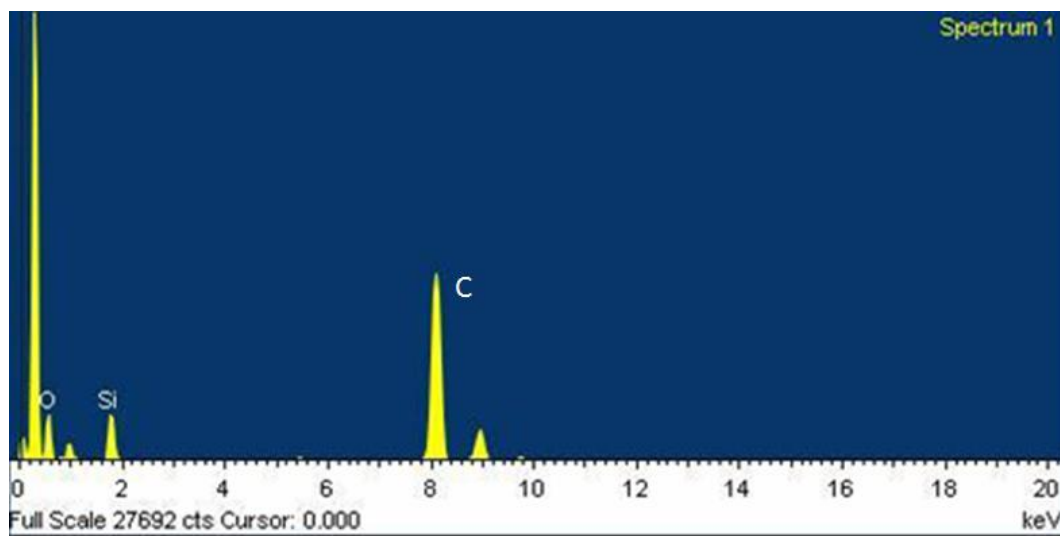

40  
41

Figure S<sub>1</sub>(d): EDX of C/SiO<sub>2</sub> core-shell sphere (C- template at at 170 °C for 8 hours).

42 **(B) Top-Down Approach for the Preparation of Colloidal Carbon Nanoparticles**  
43 **[Polyoxometalate - assisted solution technique]:**

44 The top-down approach is based on the spontaneous and strong chemisorption of  
45 polyoxometalates (POM) on carbon surfaces. We prepared CNPs as follow: a mixture of 1.5 gm  
46 Carbon Black in 60 mL deionized water (0.01 M phosphomolybdic Acid) was ultra-sonicated for 2  
47 hours in which the mixture was centrifuged and the dispersion medium was renewed every 30  
48 minutes (Ultrasonic Processor Model VCX 500 [Power: 500W - Frequency: 20kHz]). At the end of  
49 reaction the carbon nanoparticles were collected and dried at 80 °C for 4 hours. The final product  
50 was characterized without pre-treatment with sulfuric acid that used for removing adsorbed MoO<sub>x</sub>

01 on the surface of CNPs which cause formation of crosslinked structure as shown in Figure S<sub>2</sub>(a and  
02 b). EDX of cross-linked carbon nanoparticles (CNPs cross-linked by MoO<sub>x</sub>) is shown in Figure  
03 S<sub>2</sub>(b).

04

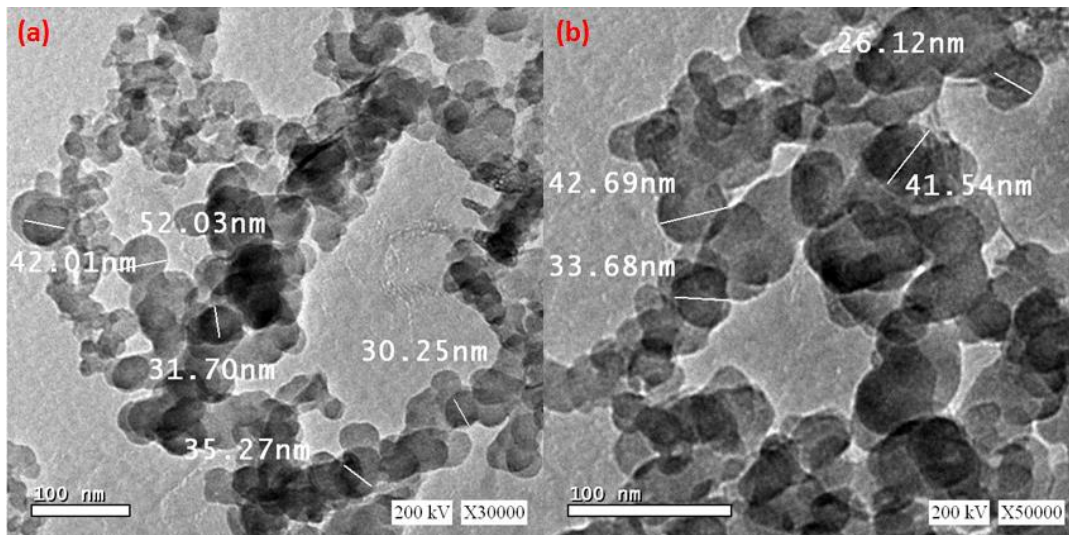

05

06 Figure S<sub>2</sub>(a): TEM of cross-linked carbon nanoparticles prepared by top-down approach.

07

08

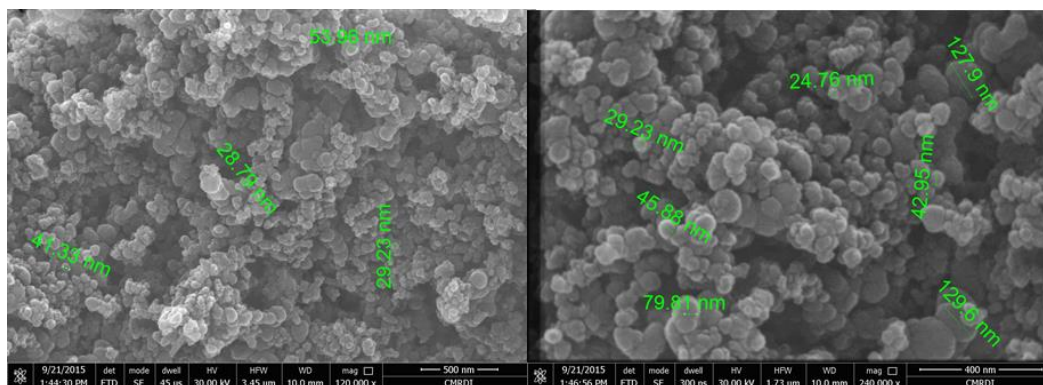

09

10 Figure S<sub>2</sub>(b): FESEM of cross-linked carbon nanoparticles prepared by top-down approach.

11

12

13

14

| Element | Weight% | Atomic% |
|---------|---------|---------|
| O K     | 70.01   | 92.24   |
| P K     | 2.55    | 1.73    |
| Mo L    | 27.44   | 6.03    |
| Totals  | 100.00  |         |

٦٥

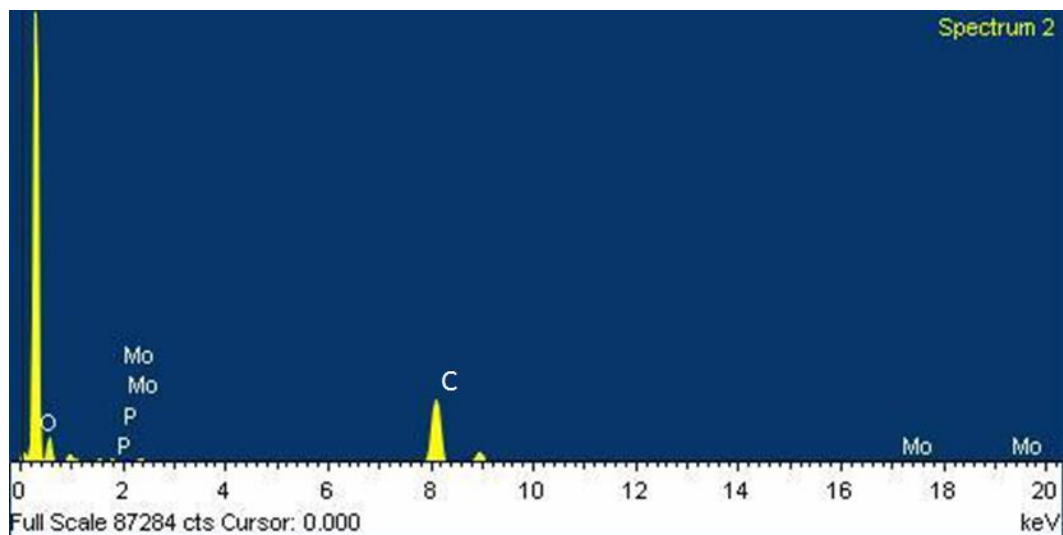

٦٦

Figure S<sub>2</sub>(c): EDX of cross-linked carbon nanoparticles (CNP) cross-linked by MoO<sub>x</sub>.

٦٧

٦٨

٦٩ **(c) Designing and conceiving the idea [Top-Down Approach for the Preparation of Colloidal**  
 ٧٠ **Carbon Nanoparticles]:**

٧١

*Abdelmohsen* conceived and designed the idea of synthesizing cross-linked metal oxides, by imitating the same approach has been used for preparation of cross-linked (pre-treated) carbon nanoparticles that were synthesized by top-down approach. Fortunately, due to the difference in chemistry of metal oxides surface in comparing with carbon black, the cross-linked structure experienced further morphology transition to hybrid nanoplatforms. We were preparing carbon nanoparticles (CNP) to be used along with SiO<sub>2</sub>@C core-shell sphere as anode material for lithium ion batteries. The CNPs act as the bridging material that prevent agglomeration of SiO<sub>2</sub>@C core-shell spheres, connect them to the current collector, suppress the volume expansion of silicon oxide (~400%), and enhance diffusion of lithium ions and electrons which enhance the power density of battery. Similarly, the novel idea was conceived and based on designing cross-linked metal oxides to enhance the performance of anodes in lithium ion batteries. Additionally, we may use graphene as an encapsulating conductive agent to afford double protection strategies for the core-shell sphere as along with CNPs. In other words graphene acts as a "buffer zone" for volume variation of SiO<sub>2</sub>@C

٧٢

٧٣

٧٤

٧٥

٧٦

٧٧

٧٨

٧٩

٨٠

٨١

٨٢

٨٣

core-shell spheres and take part in the whole capacity of battery. The expected structure when various metal oxide nanostructures react with PMA is shown in Figure S<sub>3</sub>.

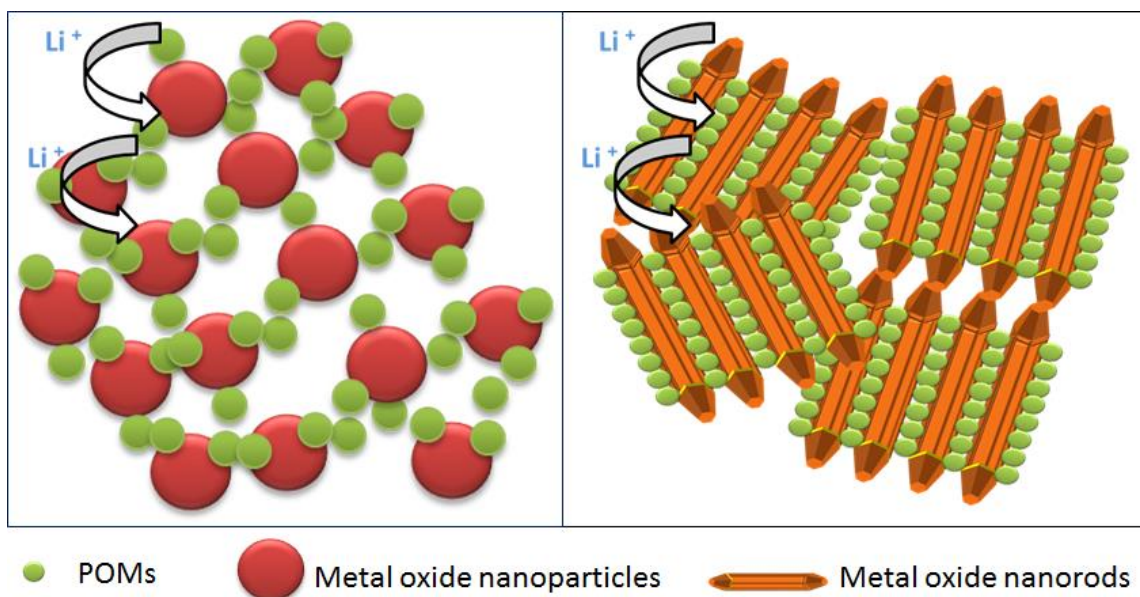

86

87 Figure S<sub>3</sub>: Expected structure when metal oxide nanoparticles (left) or nanorods (right) react with PMA to be  
88 used as electrodes in lithium ion batteries.

89 **(d)Detailed Characterization:**

90 **1. Field Emission Scanning Electron Microscope (FESEM) Analysis:**

91

92 SEM images represent statistical distribution of the composite components (ZnO grafted  
93 MoO<sub>x</sub> nanoplatelets and decorated nanorods) within the whole sample. As shown in Figure S<sub>4</sub>, the  
94 ZnO nanorods are well distributed, that is either individually adsorbed on the surface of  
95 nanoplatelets or collected closely by few amounts of molybdenum oxides to form flower and cage  
96 like structures.

97

98



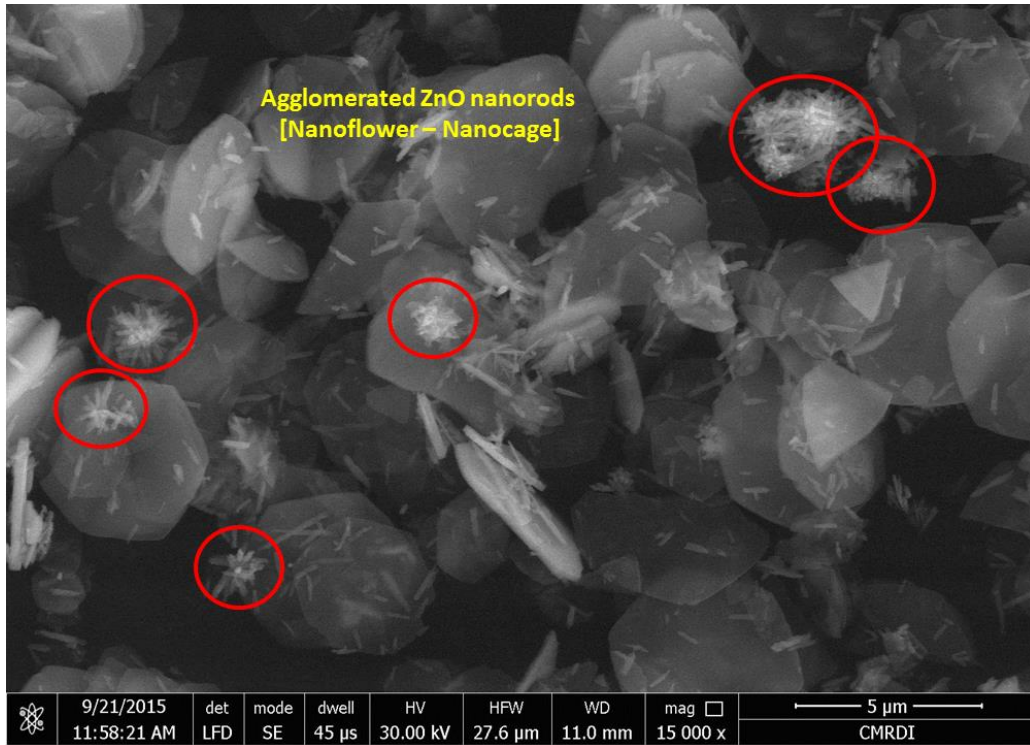

99

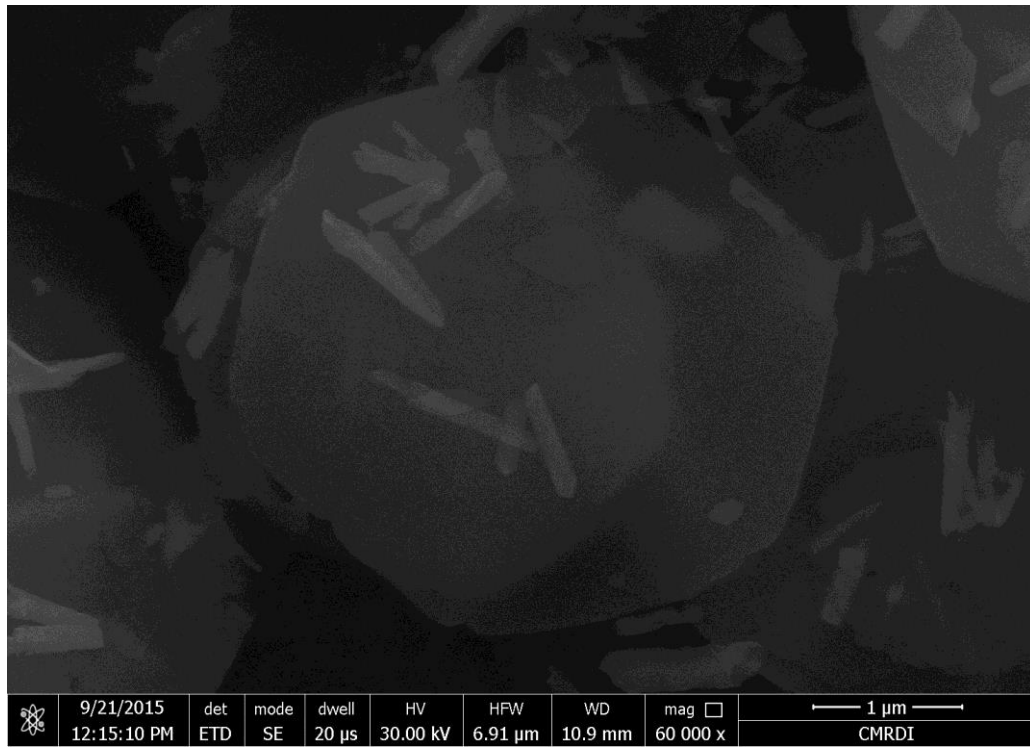

100

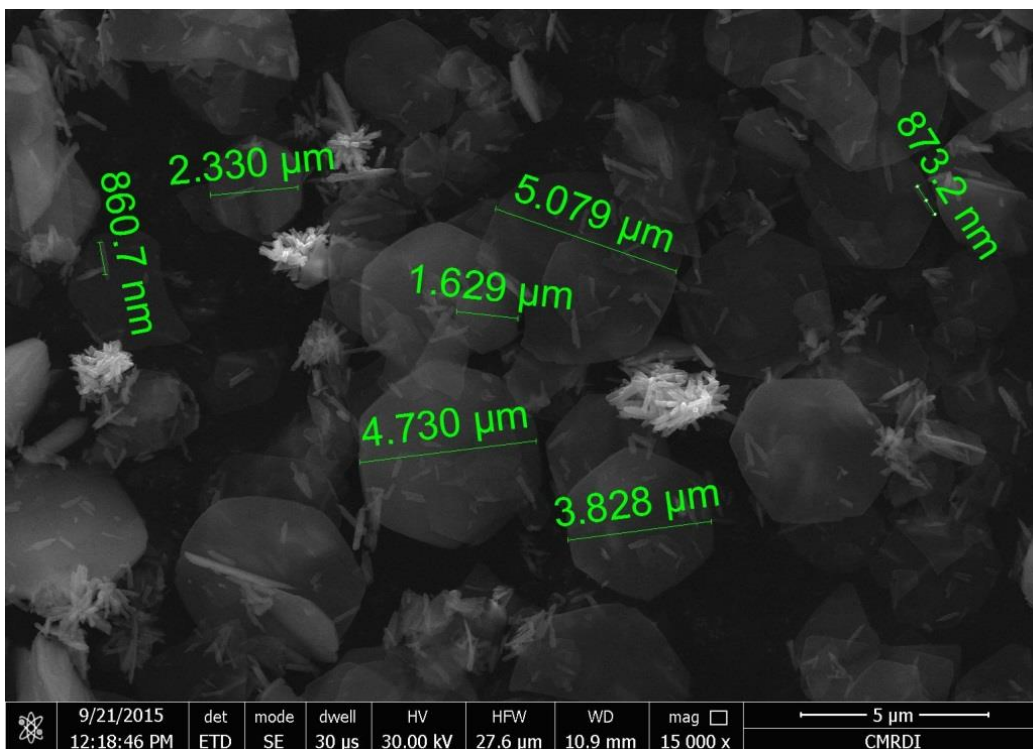

1.1

1.2

Figure S<sub>4</sub>: SEM images of ‘decorated ZnO grafted MoO<sub>x</sub> nanoplatelets’ that illustrate the decorating structures and the dimensions of the nanoplatelets and nanorods over the entire sample (Sample c - 15 minutes).

1.3

1.4

1.5

1.6

**2. Size Distribution:**

1.7

1.8

Figure S<sub>5</sub> (a,b) shows the size distribution of ZnO and decorated nanoplatelets, respectively. The size distribution' range increased after the morphology transition due to the formation of the nanoplatelets with dimensions larger than that of ZnO nanorods. These values of size distribution well agreed with that determined by FESEM.

1.9

1.10

1.11

1.12

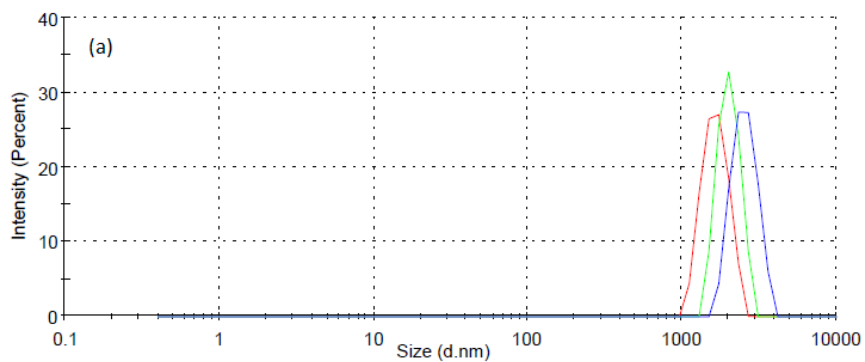

1.13



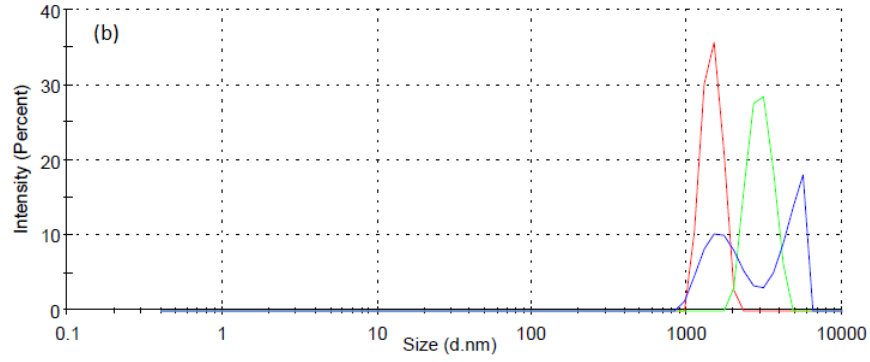

114

115

Figure S<sub>5</sub>: The size distribution for (a) pure ZnO nanorods and (b) the nanocomposite.

116

### 117 3.Zeta Potential:

118

119

120

121

122

Figure S<sub>6</sub> (a,b) show the average zeta potential values for ZnO nanorods and the nanocomposite (23.4 mV and 1.14mV), respectively. The measurements were carried out at pH=7 (lower than IEP of ZnO), so ZnO carried a positive charge, that decreased significantly after immersion in PMA solution which carried a negative charge.

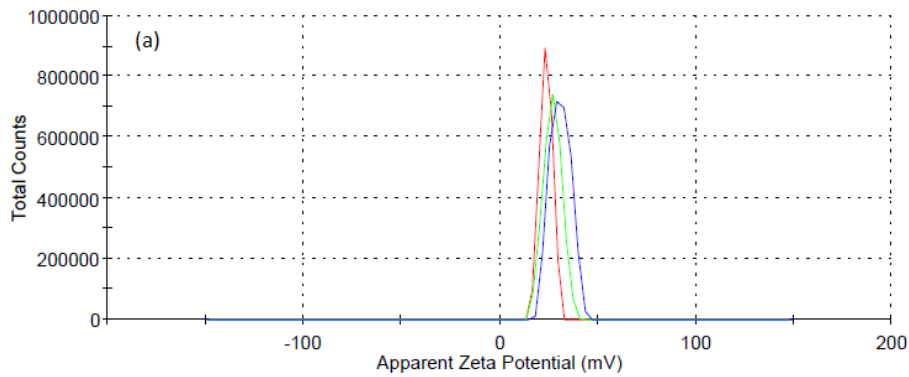

123

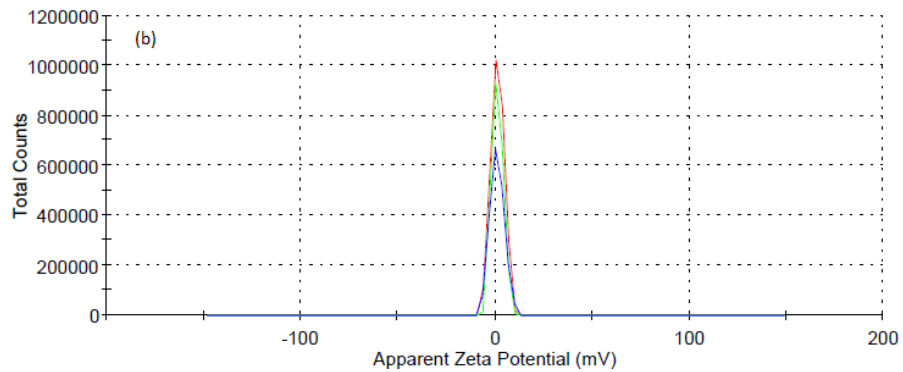

124

125

Figure S<sub>6</sub>: The zeta potential values for (a) ZnO nanorods and (b) the nanocomposite.

126

127

128 **4. Polarization of Ionic Zinc Oxide (ZnO) Bond:**

129  
130  
131  
132  
133  
134

As shown in Figure S<sub>7</sub>, cation tends to attract the electron cloud of oxygen anion towards itself because the electron cloud in the anion is loosely held by its nucleus. The anion lose its spherical symmetry and undergoes some distortion. The electron cloud of oxygen ion gets polarised and electron density is pulled in between the nuclei of the two ions. The ionic bond does not remain 100% ionic but develops some covalent character.

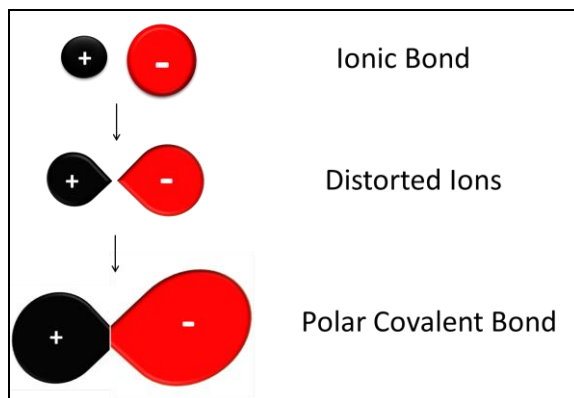

135  
136

Figure S<sub>7</sub>: Development of the polar covalent bond between Zinc cation and oxygen anion.

137 **5. Reaction Progress:**

138  
139  
140  
141  
142

Figure S<sub>8</sub> shows the reaction progresses until complete of reaction. The reaction was completely finished and this was indicated visually, as the characteristic yellow color of POM anions was disappeared completely and the solvent was a transparent. Moreover, the reproducibility of the experiments was checked and revealed the same result.

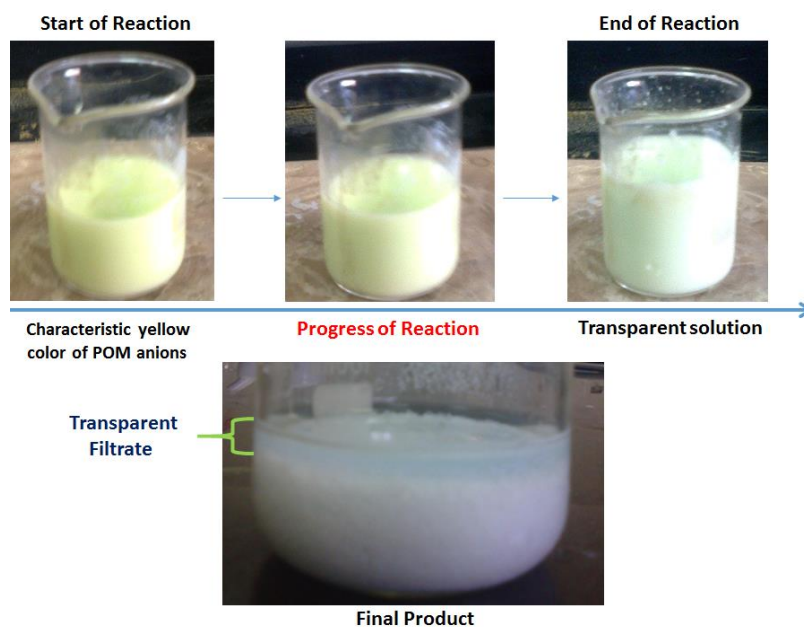

143  
144

Figure S<sub>8</sub>. Show the reaction progress to the end of reaction.

140  
146  
147  
148  
149  
150  
151  
152

## 6. HRTEM Measurements:

Regarding HRTEM, we have selected platelets with different dimensions to study the proposed mechanism. The contrast of low magnification may interrupt the grain boundary but not justify them. Moreover, the contrast is due to the decorating structures that absorbed on surface which cannot be avoided. This is more obvious in the following HRTEM images (Figure S<sub>9(a)</sub>). HRTEM images show the first step that involves fusion of ZnO nanorods that will be followed by self-assembly to nanoplatelets are shown in Figure S<sub>9(b)</sub>.

153

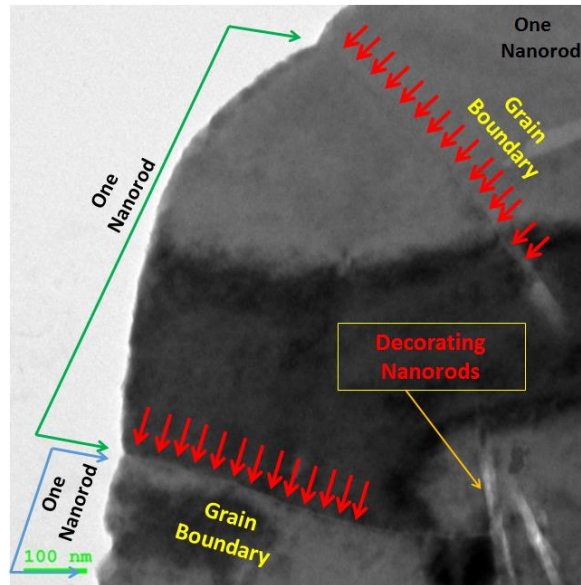

154

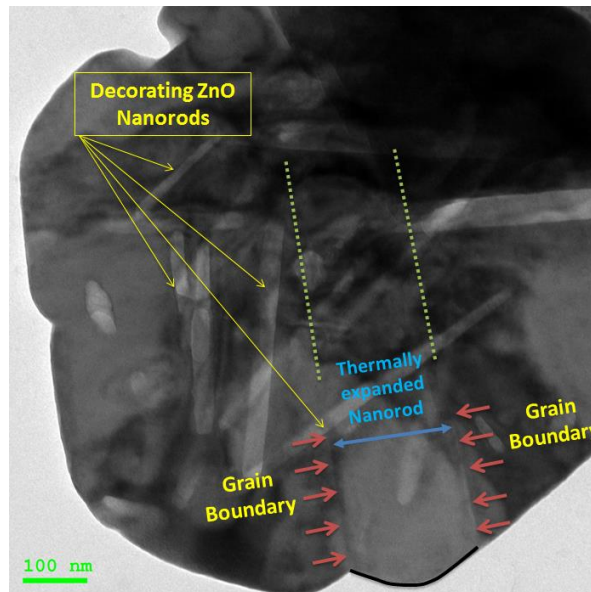

155  
156  
157  
Figure S<sub>9(a)</sub>: HRTEM for the decorated ZnO grafted MoO<sub>x</sub> nanoplatelets illustrate the grain boundaries between fused nanorods [Deposition of MoO<sub>x</sub> hinder active sites, and prevent further incorporation of Zn and O species to attain complete fusion].

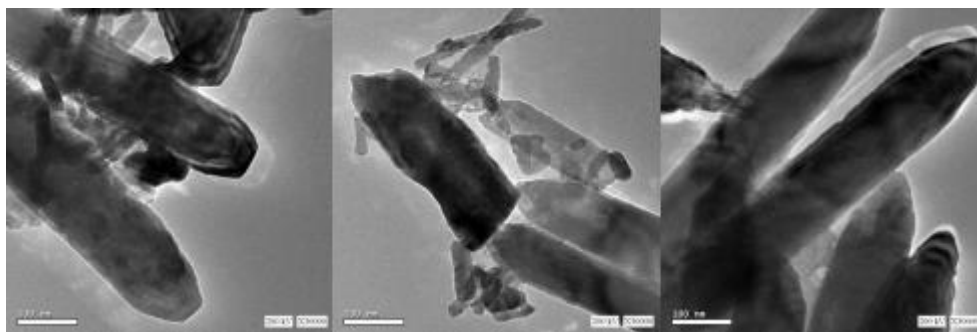

158

159

160

Figure S<sub>9</sub>(b): HRTEM images show the first step that involves fusion of ZnO nanorods that will be followed by self-assembly to nanoplatelets.

161

### 7. Energy-Dispersive X-ray spectroscopy (EDX):

162

163

164

165

166

Energy-dispersive X-ray spectroscopy (EDX) analysis was used to confirm the elemental composition of various crystals through the samples. Oxygen has not taken on account as oxygen of water that was used in sample preparation may affect the accuracy of results. Figure S<sub>10</sub> illustrates EDX analysis of selected nanoplatelet and ZnO nanorod that decorates the nanoplatelets.

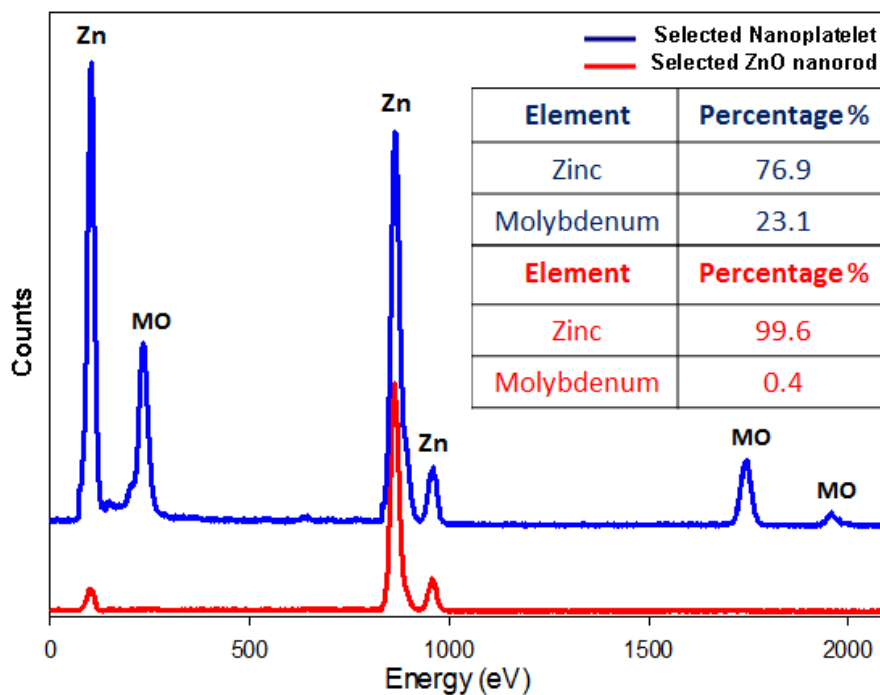

167

168

169

170

171

172

Figure S<sub>10</sub>: EDX of selected (ZnO nanoplatelets grafted Mo<sub>8</sub>O<sub>23</sub>-MoO<sub>2</sub>) and (ZnO nanorod).

173 **8. XPS Analysis:**

174

175

176

177

178

179

180

181

182

183

Figure S<sub>11</sub> (a and b) show XPS survey for different elements in the energy range (0 – 1100) eV. The adventitious carbon (surface contamination) presents a classical shape of major C-(C,H) contribution and a few oxidized species. The C-(C,H) peak was fixed at 284.8 eV (calibration). Moreover, Cl and P were not recorder with high resolution and the estimated quantification are extracted from survey spectra as shown in Figure S<sub>11</sub> (a,b). The characteristic XPS spectra for MoO<sub>3</sub> is so similar to that of Mo<sub>8</sub>O<sub>23</sub>, but we recommend the latter as the main peak at  $2\theta = 12.278^\circ$  represents the most characteristic peak of the monoclinic Mo<sub>8</sub>O<sub>23</sub> (011) not of MoO<sub>3</sub>. Non-lattice oxygen was detected by XPS analysis, which may support also diffusion of oxygen in the outer surface.

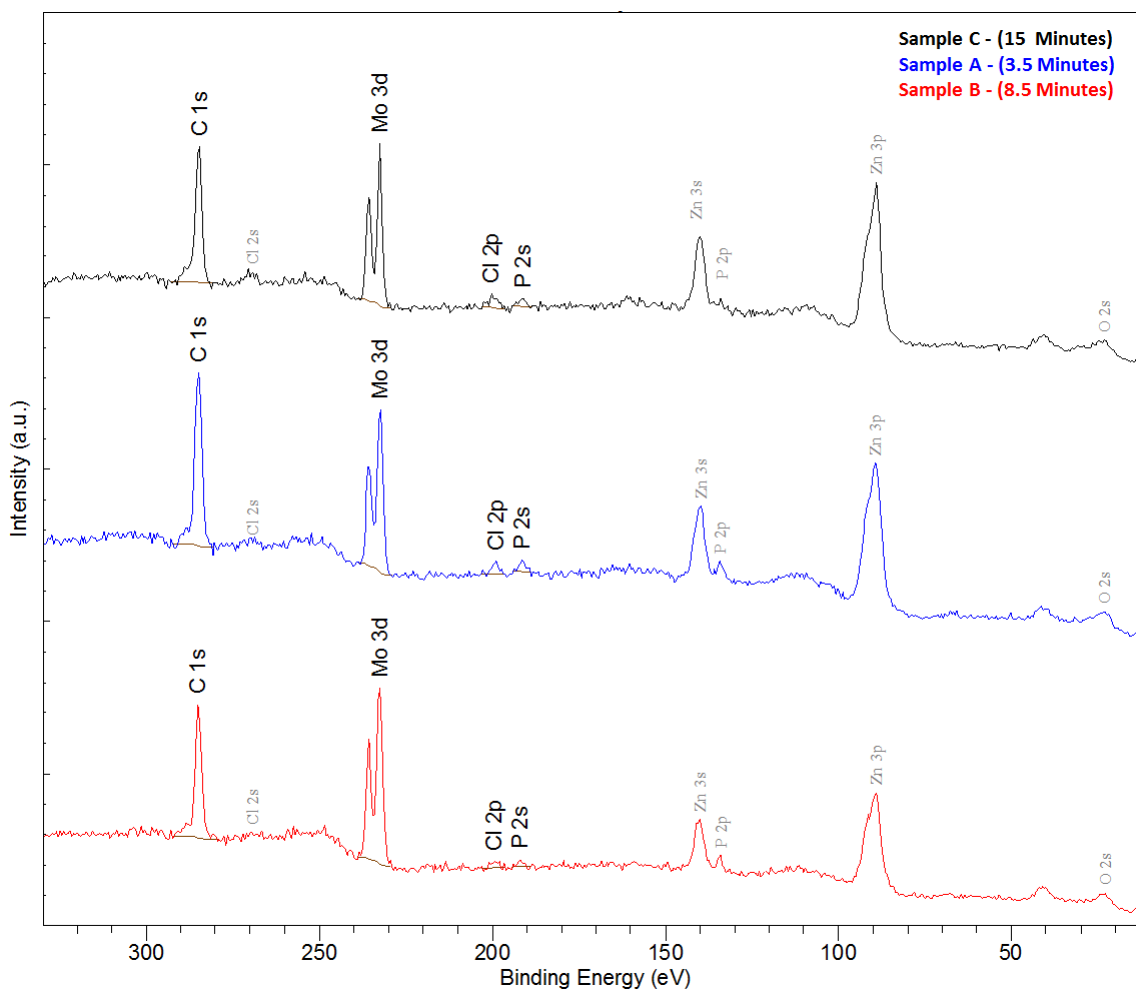

184

185

186

187

Figure S<sub>11</sub> (a): XPS survey for three samples of the nanocomposite that were picked up at different intervals (3.5, 8.5, and 15 minutes) after starting of reaction [Energy Range: 0 – 330 eV].



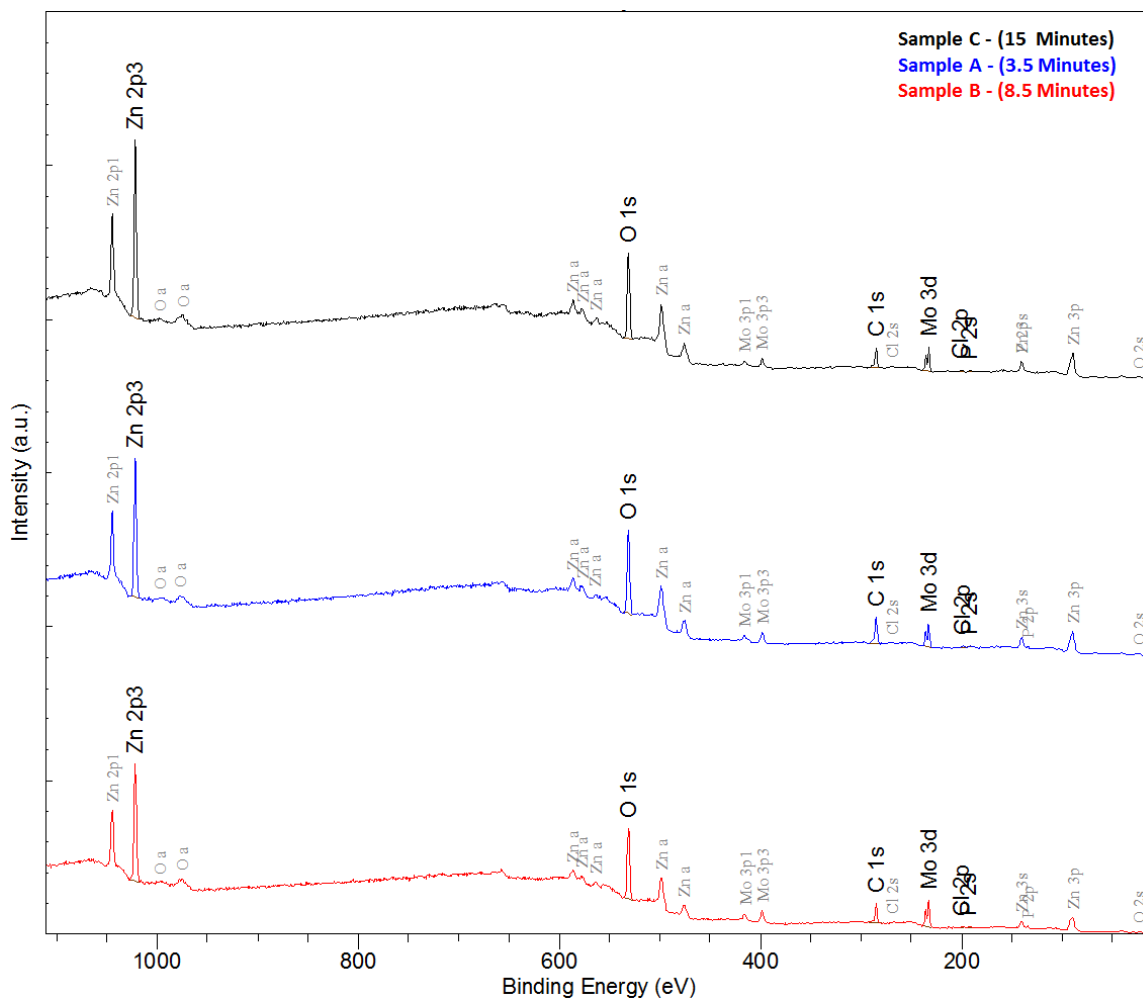

188

189 Figure S<sub>11</sub> (b): XPS survey for three samples of the nanocomposite that were picked up at different intervals (3.5, 8.5,  
 190 and 15 minutes) after starting of reaction [Energy Range: 330 – 1100 eV].

191

192

193

194

195

196

197

198

199

200 **9.X-ray Diffraction and FESEM:**

201

202 XRD spectra were recorded for selected transition metal oxides (SnO, Fe<sub>2</sub>O<sub>3</sub>, Co<sub>3</sub>O<sub>4</sub>, and  
203 CuO) nanomaterials before and after treatment with POMs as shown in Figure S<sub>12</sub> (a,b,c). All of them  
204 were synthesized by microwave assisted solution method. The study reveal that all of the  
205 aforementioned metal oxides has not experienced any morphology transition/self-assembly.Hence,  
206 This phenomenon seems to be restricted to zinc oxide (ZnO). FESEM images for the metal oxides  
207 nanomaterials after reaction with POM are shown in Figure S<sub>12</sub> (d,e,f).

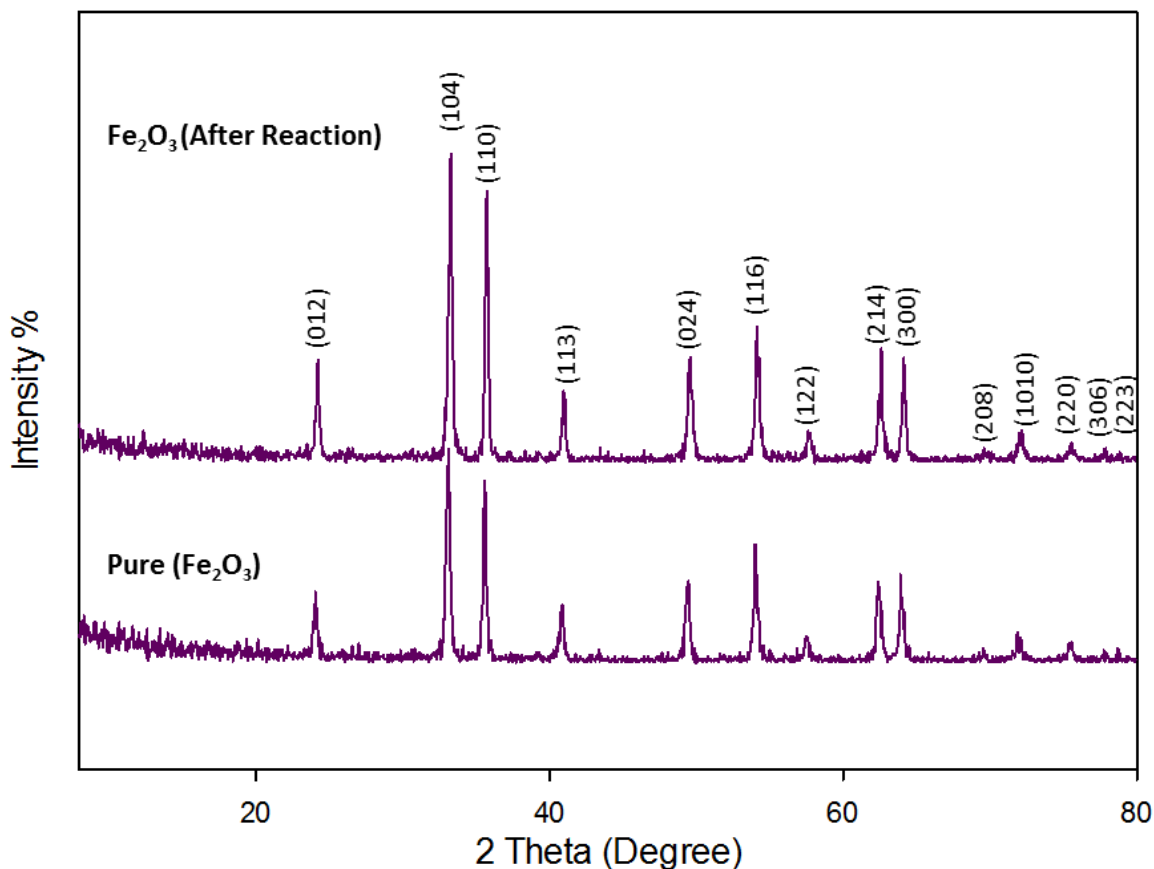

208

209 Figure S<sub>12</sub> (a): XRD Patterns for Pure Fe<sub>2</sub>O<sub>3</sub> nanoparticles before and after reaction with POM.

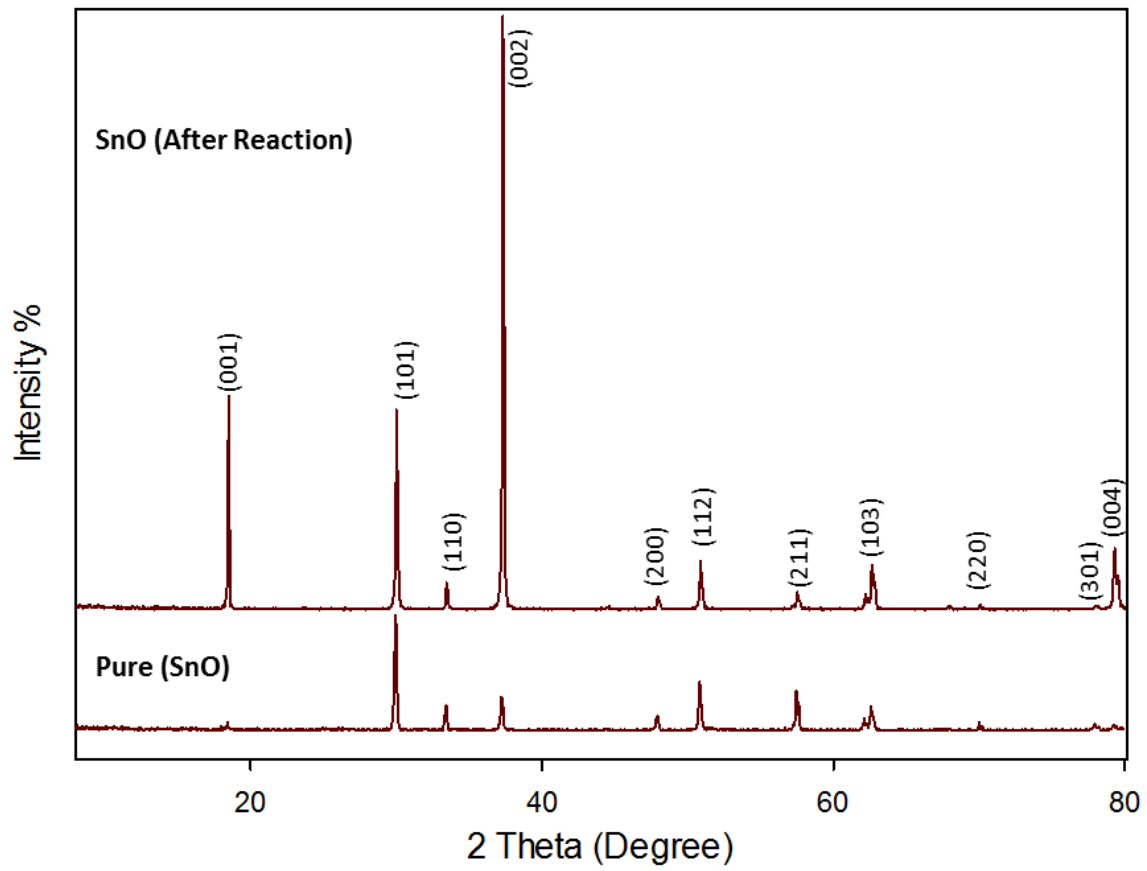

۲۱۰

۲۱۱

۲۱۲

Figure S<sub>12</sub>(b): XRD Patterns for Pure SnO nanoparticles before and after reaction with POM.

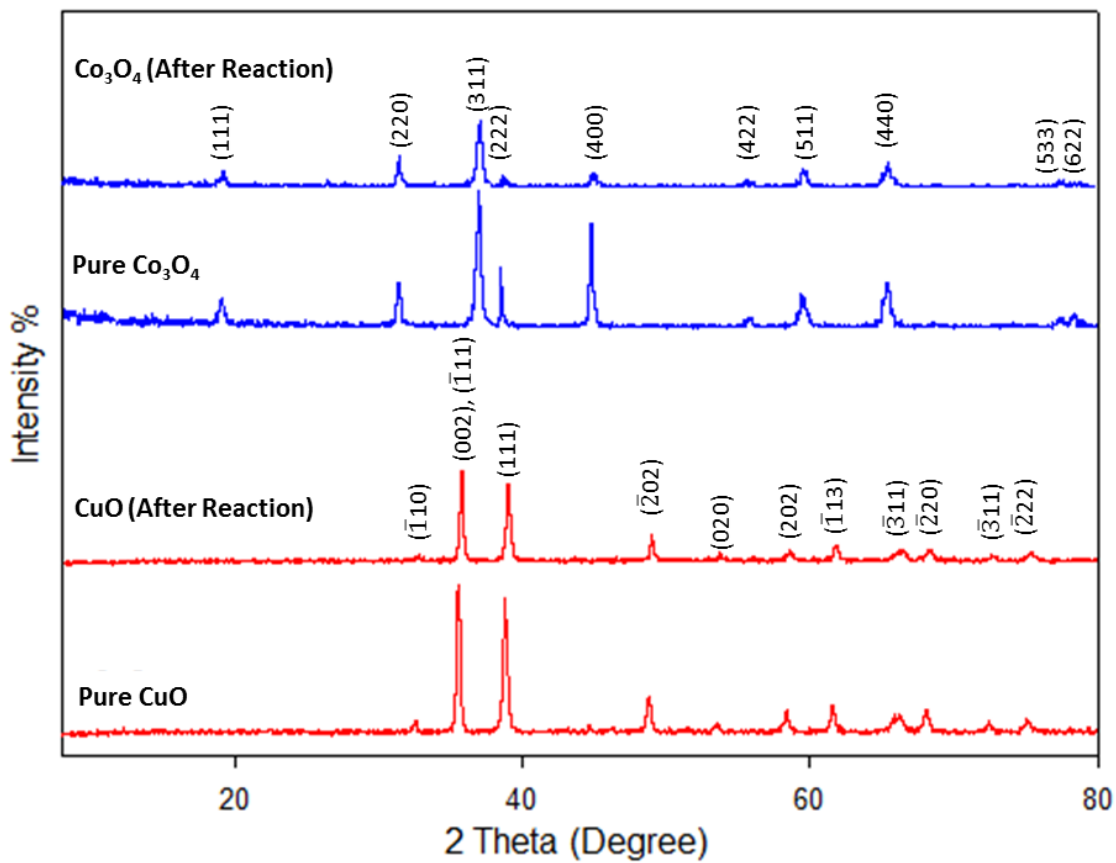

213

214

215

Figure S<sub>12</sub> (c): XRD Patterns for Pure CuO nanoparticles (down) and Pure  $\text{Co}_3\text{O}_4$  nanorods before and after reaction with POM.

216

217

218

219

220

221

222

223

۲۲۴

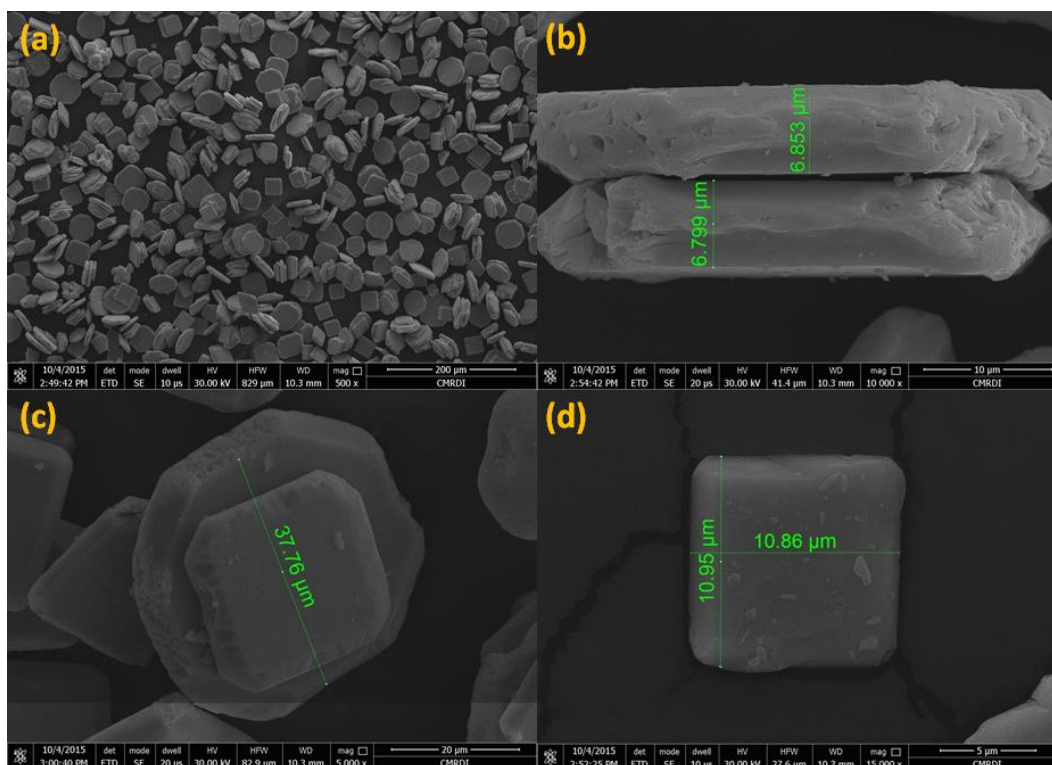

۲۲۵

۲۲۶

۲۲۷

Figure S<sub>12</sub>(d). FESEM images of SnO nanoparticles after reaction with POM (a,b,c,d).

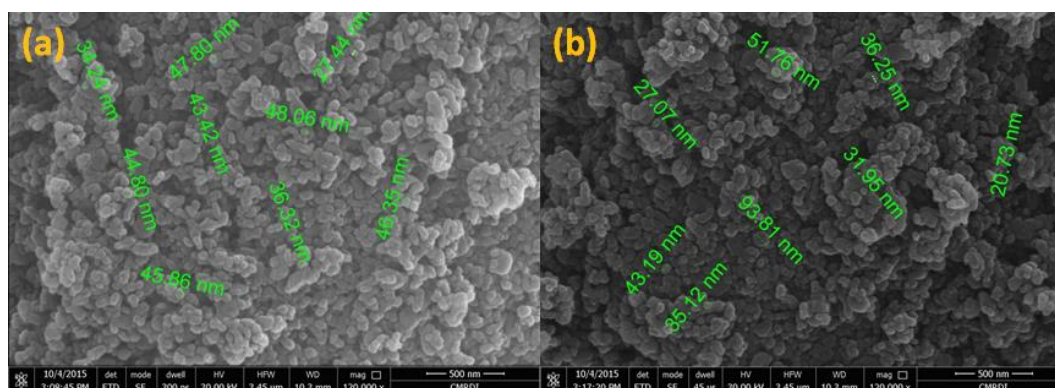

۲۲۸

۲۲۹

۲۳۰

۲۳۱

۲۳۲

Figure S<sub>12</sub>(e). FESEM images of Fe<sub>2</sub>O<sub>3</sub> nanoparticles after reaction with POM (a,b).



۲۳۳

۲۳۴

۲۳۵

۲۳۶

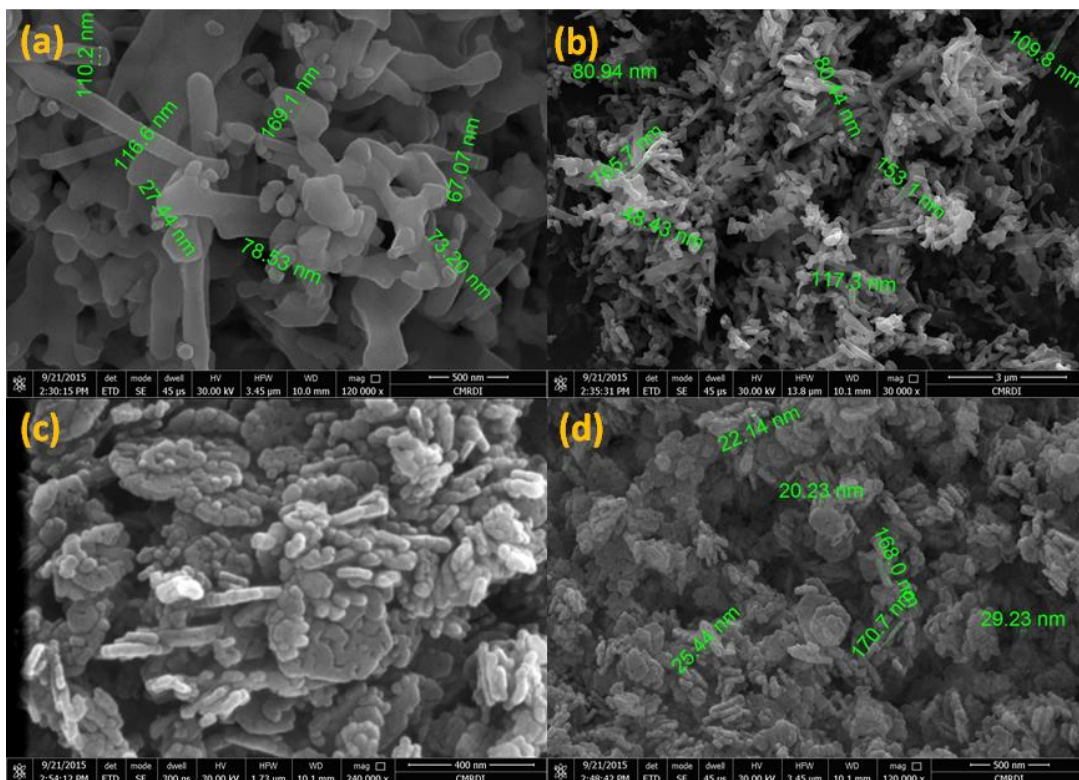

۲۳۷

۲۳۸

۲۳۹

۲۴۰

۲۴۱

۲۴۲

۲۴۳

۲۴۴

۲۴۵

Figure S12(f): FESEM images of Co<sub>3</sub>O<sub>4</sub> nanorods (a,b), and CuO nanoparticles after reaction with POM (c,d).

۲۴۶  
 ۲۴۷  
 ۲۴۸  
 ۲۴۹  
 ۲۵۰  
 ۲۵۱  
 ۲۵۲  
 ۲۵۳

### 10. Magnetic Properties of Cations and Anions:

Figure S<sub>3</sub> shows schematic illustration for the ability of crystal field theory (CFT) to help in describing the empty-filled interaction between 4s and 2p-orbitals of zinc cation and oxygen anion respectively, which may account for the possibility of other oxides to experience morphology transition.

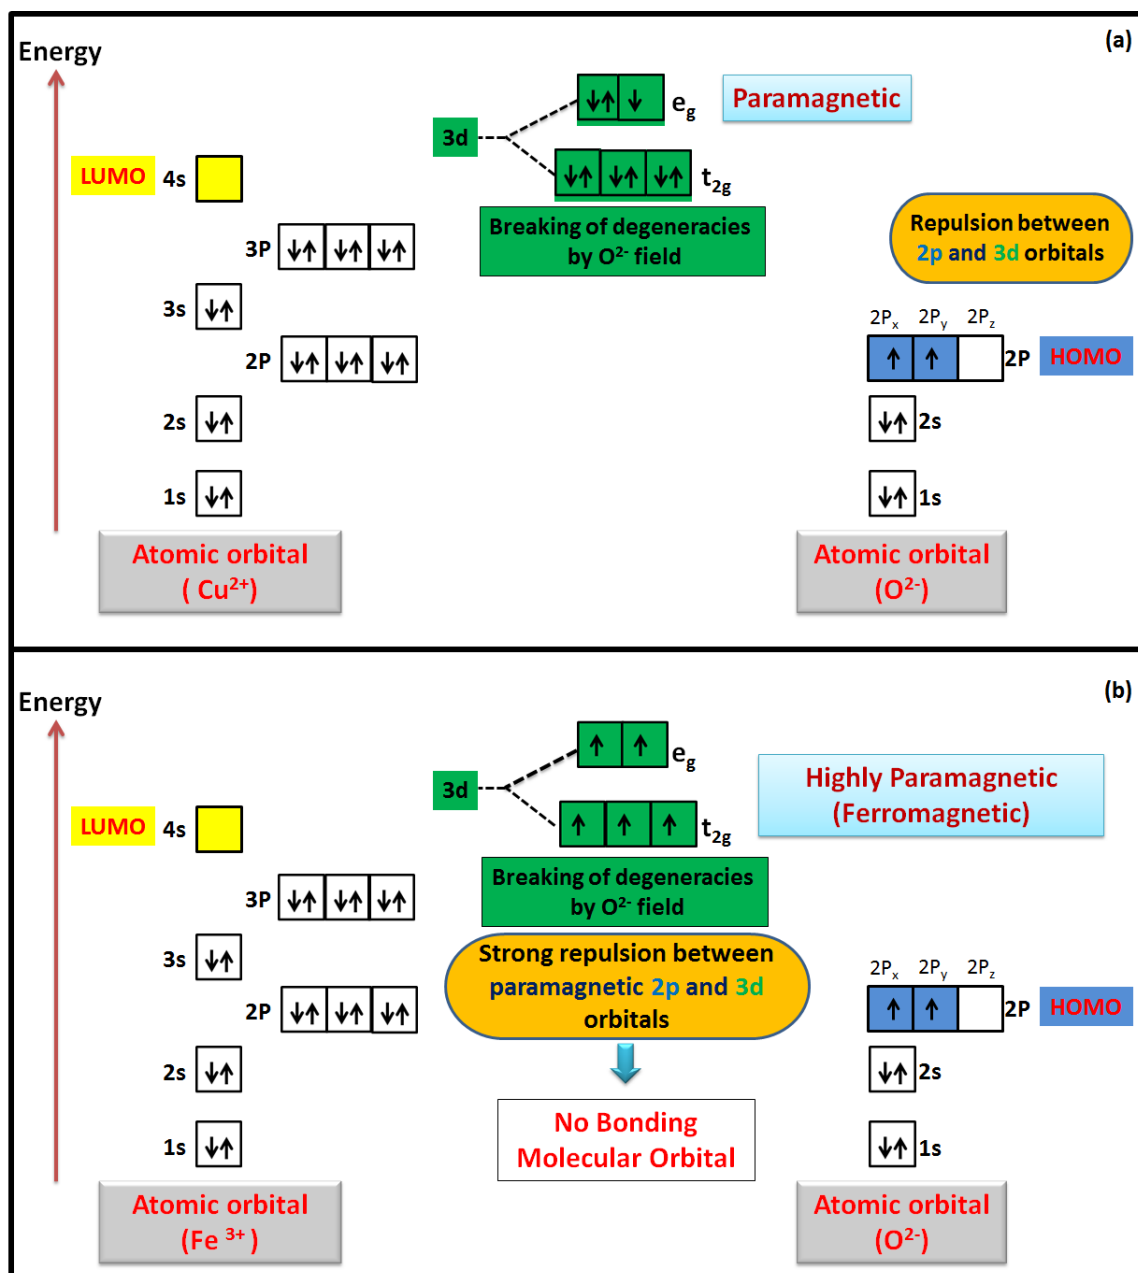

۲۵۴  
 ۲۵۵  
 ۲۵۶  
 ۲۵۷

Figure S<sub>13</sub> (a): Schematic illustration for splitting of 3d-orbital of cation in the static field of ligand (oxygen anion) and obstructing atomic orbitals interaction.

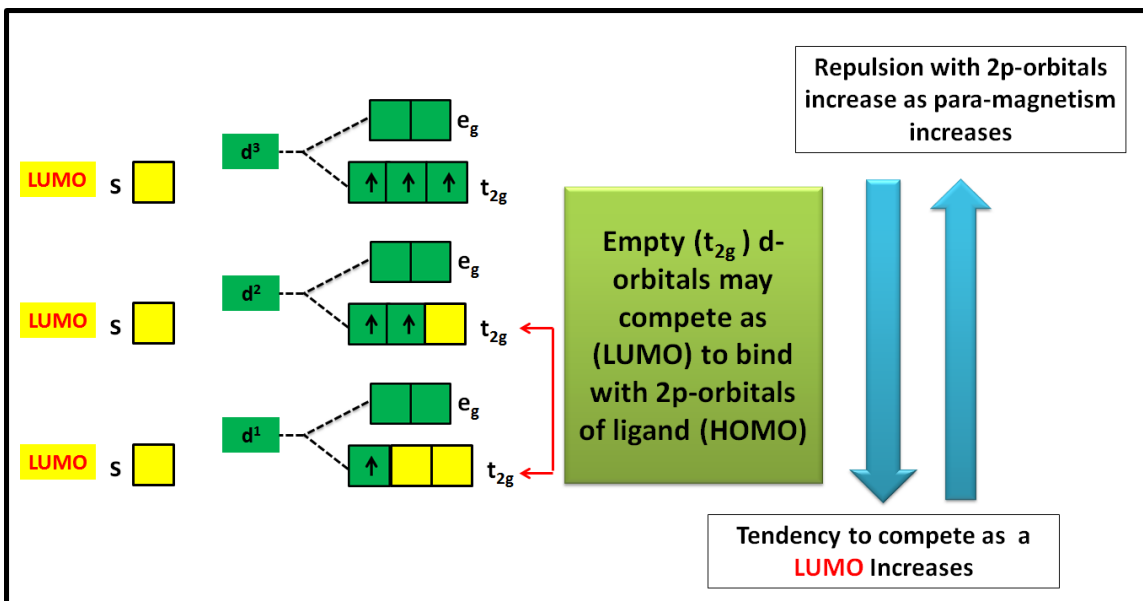

२०८

२०९

२६०

२६१

Figure S<sub>13</sub> (b): Schematic illustration for splitting of 3d-orbital of cation in the static field of ligand (oxygen anion) and expected competition of d-levels as a LUMO.
